# Supplementary material for: Efficient identification of novel mutations in patients with limb girdle muscular dystrophy
Source: Springer Nature journal article supplement (doi:10.1007/s10048-010-0250-9), 2010-07-12
Supplement: MOESM1 [file 8706054]

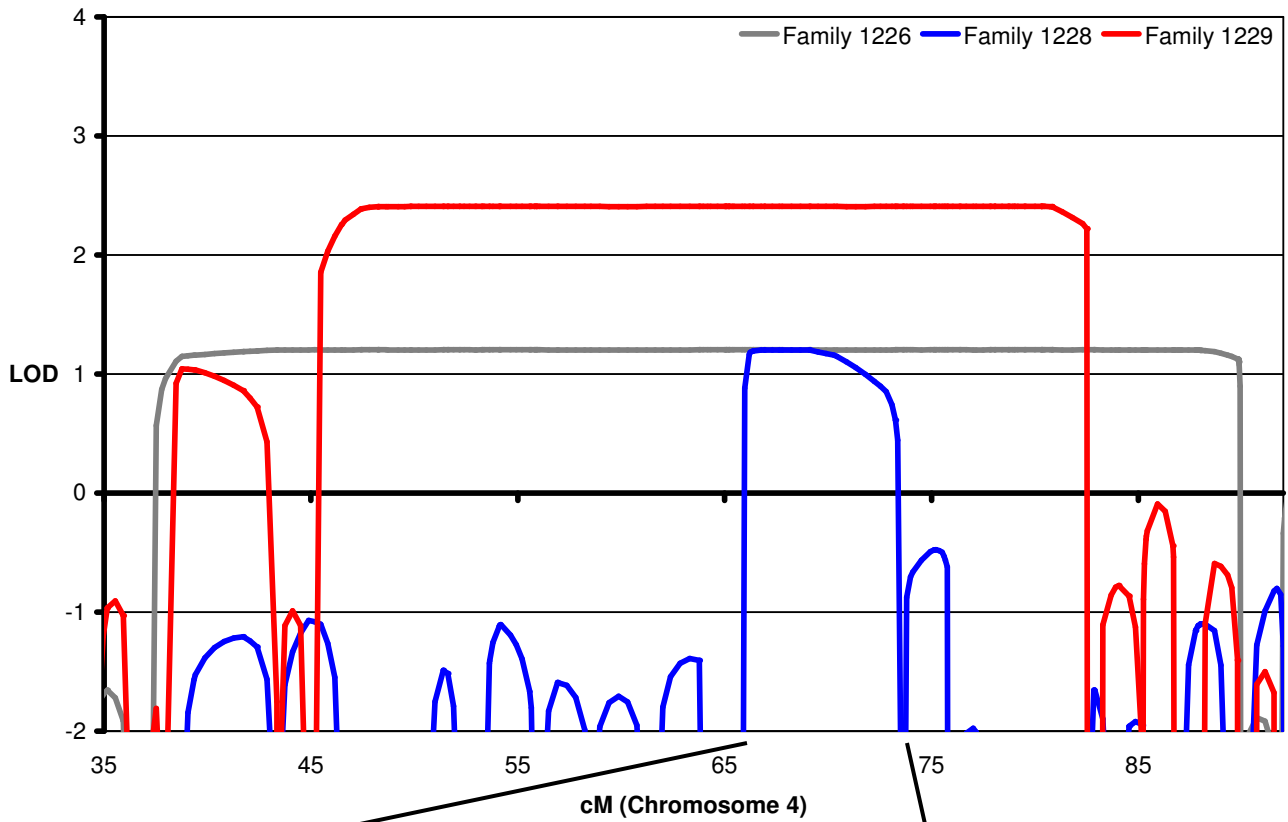

|   |   |   |   |   |   |   |   |   |   |   |   |   |   |   |   |   |   |   |   |   |                       |
|---|---|---|---|---|---|---|---|---|---|---|---|---|---|---|---|---|---|---|---|---|-----------------------|
| B | A | A | B | B | B | B | B | B | A | B | A | B | B | A | A | A | B | B | B | A | Family 1226 haplotype |
| B | A | A | B | B | B | B | B | B | A | B | A | B | B | A | A | A | B | B | B | A | Family 1228 haplotype |
| B | A | A | B | B | B | B | B | B | A | B | A | B | B | A | A | A | B | B | B | A | Family 1229 haplotype |

  
**SGCB**
