# Supplementary material for: Efficient identification of novel mutations in patients with limb girdle muscular dystrophy
Source: Springer Nature journal article supplement (doi:10.1007/s10048-010-0250-9), 2010-07-12
Supplement: MOESM2 [file 8706054]

**A**


```

Homo_sapiens      GTVVGDTPAYLYEERWTPPCCLRALRETARYVVGVLEAAGVRYWLEGGSLLGAARHG
Pan_troglodytes   GTVVGDTPAYLYEERWTPPCCLRALRETARYVVGVLEAAGVRYWLEGGSLLGAARHG
Gorilla_gorilla   GTVVGDTPAYLYEERWTPPCCLRALRETARYVVGVLEAAGVRYWLEGGSLLGAARHG
Macaca_mulatta    GTVVGDTPAYLYEERWTPPCCLRALRETARYVVGVLEAAGVRYWLEGGSLLGAARHG
Canis_familiaris  GTVVGDTPAYLYEERWTPPCCLRALRETARYVVGVLEAAGVRYWLEGGSLLGAARHG
Rattus_norvegicus GTVVGDTPAYLYEGRWTPPCCLRALRETARYVVGVLEAAGVRYWLEGGSLLGAARHG
Mus_musculus      GTVAGDTPAYLYEGRWTPPCCLRALRETARYVVGVLEAAGVRYWLEGGSLLGAARHG
Bos_taurus        GTVVGDTPAYLYEERWTPPCCLRALRETARYVVGVLEAAGVRYWLEGGSLLGAARHG
Sus_scrofa        GTVVGDTPAYLYEGRWTPPCCLRALRETARYVVGVLEAAGVRYWLEGGSLLGAARHG
Monodelphis_domestica DTVVGDTPSYLYEGRWTPPCCLRALRETARHVIGVLEAARVRYWLEGGSLLGAVRHG
Gallus_gallus     GTVLARTPRYLLQGRWTPPCCLRALRETAKHVVEVLEGSVRYWLEGGSLLGAVRLR
Anolis_carolinensis GTIHDDTPEYLYQNRWTPPCCLRALRETAKYVINILETSGVRYWLEGGTLLGAARHQ
Xenopus_tropicalis GTVVEGTPQYLYNNQWTPPCCLRALRTTTHHVIKVLEASGVRYWLEGGSLLGAARNG
Danio_rerio       GTVRDDTPEYLYIERWTPPCCLRALRETTKYVINILESSGVRYWLEGGSLLGAARHQ
.*:  ** **  :*****:*** *::*: :** : *****:****.*

```

**B**


```

Homo_sapiens      AGGGCCGAAAAGAAGGGTAGG-----TGTGCAACCCTAGA-G
Pan_troglodytes   AGGGCCGAAAAGAAGGGTAGG-----TGTGCAACCCTAGA-G
Gorilla_gorilla   AGGGCCGAAAAGAAGGGTAGG-----TGTGCAACCCTAGA-G
Macaca_mulatta    AGGGCCGAAAAGAAGGGTAGG-----TGTGCAACCCTAGA-G
Canis_familiaris  AGGGTCGCAAGGAAGGGTAAG-----TGTGTGACCCAGGA-G
Felis_catus       AGGGTCGCAAGGAAGGGTAAG-----CGTGCAATCCGGGA-G
Rattus_norvegicus AGGGCCGGAAGGAAGGGTAAG--AAGGGGCAACCCAGGAAG
Mus_musculus      AGGGACGGAAGGAAGGGTGAG-----GGGGCAACCCGGGAAA
Equus_caballus    AGGGCCGCAAGGAAGGGTAGG-----TATGCAGCCCAGGA-G
Bos_taurus        AGGGCCGCAAGGAAGGGTAGG-----TATGCAGCCCAGGA-G
Sus_scrofa        AAGGTCGAAAGGAAGGGTAGG-----CATGCGACCAGGGA-G
Monodelphis_domestica AAGGTCGAAAGGAGGGGTAGGCTTGGTGGGGAATCCTCATGG
Xenopus_tropicalis CCGGCCACAAAGAAGGGTGCGTGCTTTATAACACTAAGGGGC
Danio_rerio       CCGGATATTTTGAGGGGTGAG-----GCTACGTATCATATCA
          **          ** **** *

```

**C**


```

Homo_sapiens      ASCEEEELPPDPSEETLLTIEARFQPLLPETMTK
Pan_troglodytes   ASYEEEEELPPDPSEETLLTIEARFQPLLPETMTK
Gorilla_gorilla   ASYEEEEELPPDPSEETLLTIEARFQPLLPETMTK
Macaca_mulatta    ASYEEEEELPPDPSEETLLTIEARFQPLLPETMTK
Canis_familiaris  ASYEEEEELPLDPSEETLLTIEARFQPLIPESMTK
Felis_catus       AASYEEEEELPLDPSEETLLTIEARFQPLIPESMTK
Rattus_norvegicus ASYEEEEELPHDPSEETLLTIEARFQPLLTETMTK
Mus_musculus      ANYEEEEELPHDPSEETLLTIEARFQPLLMETMTK
Equus_caballus    ASYEEEEELPPDPSEETLLTIEARFQPLLPESMTK
Bos_taurus        ANYEEEEELPPDPSEETLLTIEARFQPLLPESMTK
Sus_scrofa        ASYEEEEELPPDPSEETLLTIEARFQPLLPESMTK
Gallus_gallus     VSDFEED-APDPNGETLSIVAKFQPLVMETMTK
Xenopus_tropicalis TSDYEEEEELLDPNGETLSVASRFQPLLMETMTK
Danio_rerio       PPEYEEEEIPHDPNGETLTLHAKMQPLLLESMTK
          **:  ** . ***:: :::***: *:***

```

**D**

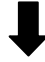

|                     |                                    |
|---------------------|------------------------------------|
| Homo_sapiens        | HHINANYFLDITSVKPEEIES-NLFSFSSTFED  |
| Pan_troglodytes     | HHINANYFLDITSMKPEEIES-NLFSFSSTFED  |
| Gorilla_gorilla     | HHINANYFLDITSMKPEEIES-NLFSFSSTFED  |
| Macaca_mulatta      | HHINANYFLDITSMKPEEVES-HLFSFSSTFED  |
| Canis_familiaris    | HHINANYFLDITSMKPEDVEN-NVFSFSSTFED  |
| Felis_catus         | HHINANYFLDITSMKPEDIEN-NVFSFPSTFED  |
| Rattus_norvegicus   | HHINANYFLDITSMKPEDMENTNVFSFSSTFED  |
| Mus_musculus        | HHINANYFLDITSMKPEDMENNNVFSFSSSFED  |
| Equus_caballus      | HHINANYFLDITSMKPEDIES-NVFSFSSTFED  |
| Bos_taurus          | HHINANYFLDITSMKPEDIEN-HVFSFSSTFED  |
| Sus_scrofa          | HHINANYFLDITSMKPQDIEN-NVFSFSSTFED  |
| Gallus_gallus       | HHINANYFLDITSMKPEDVES-SIFSFSANFDD  |
| Anolis_carolinensis | HHINANYFLDITSMKPEEVES-SIFSFSSTSFED |
| Xenopus_tropicalis  | HHINANYFLDITSLKPDEVET-NLFSFSDGVED  |
| Danio_rerio         | HHINANNFLDQTSMKP-EDEG-PGLSFSAGFED  |

\*\*\*\*\* \*\*\* \*\*:\*\*\* : \* :\*\*. .:\*
